# Supplementary material
Source: PubMed Central journal article supplement (PMC2247395)
Supplement: 7401084-s2.pdf [file 7401084-s2.pdf]

# Supplementary Figure S2

PCNA crosslinking by Rose Bengal + visible light

a)

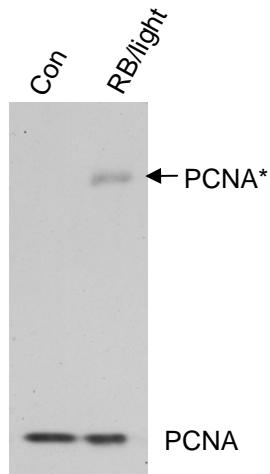

b)

PCNA crosslinking by formaldehyde

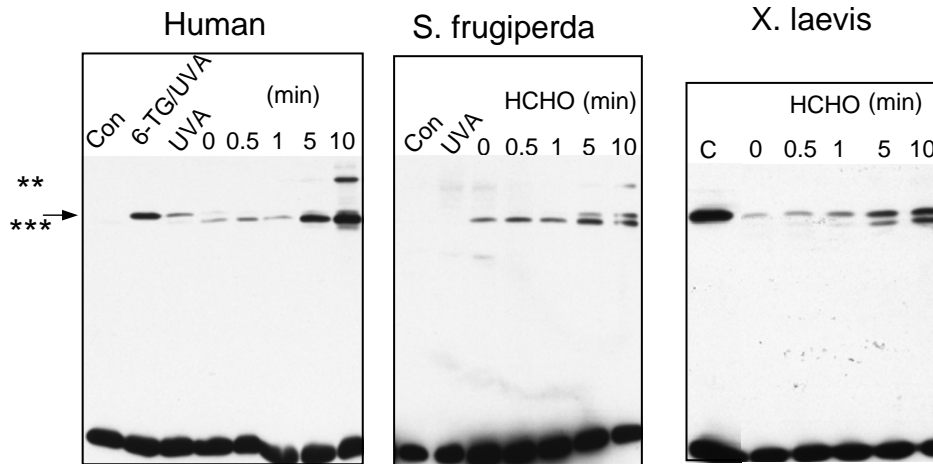

c)

PCNA crosslinking by chemical oxidants

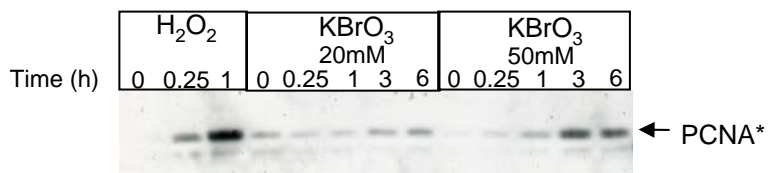

## Legends to supplementary figures

Figure S1 Formation of PCNA\* by UVA and by 6-TG/UVA treatment in Raji, CCF-CEM, and A2780 cells.

a) Asynchronous cells were treated for 15min with the concentrations of 6-TG shown and UVA irradiated. Cell extracts were analysed by western blotting with the PC10 antibody.

Upper panel. Raji cells

Middle panel. CCF-CEM cells.

Lower panel. A2780 cells.

b) Raji cells pulse-labelled for 15min with 30 $\mu$ M 6-TG were returned to medium without 6-TG. Aliquots of cells were UVA irradiated (30kJ/m<sup>2</sup>) at the indicated chase times after removal of 6-TG. Cell extracts were analysed by western blotting. [<sup>3</sup>H]-TdR incorporation into TCA-insoluble material was also determined.

Figure S2 Chemical and photochemical PCNA crosslinking

a) Photochemical

Chromatin-associated proteins were extracted from HCT116 cells synchronized by growth in 1mM hydroxyurea and treated with rose bengal (0.12mM) and visible light (RB/light) or left untreated (Con). Illumination (10min) was delivered by a 60W domestic lightbulb at a distance of approximately 10cm from the protein solution which was maintained at ice temperature during the irradiation. PCNA was detected by western blotting with PC10.

b) Chemical

*S. frugiperda* (SF9) and human (HCT116) cells in PBS were treated with 1% formaldehyde at 20° for the times indicated (min). Cells were harvested and extracts (harvesting and preparation time, approximately 5min) analysed by western blotting (6% SDS-PAGE) with PC10 antibody. Control cells were either untreated (Con) or irradiated with 300kJ/m<sup>2</sup> UVA (UVA). In an additional control (6-TG/UVA and C), HCT116 cells were grown for 24h in 1 $\mu$ M 6-TG and irradiated with 10kJ/m<sup>2</sup> UVA.

Photochemical and chemical treatments produce qualitatively somewhat different crosslinking patterns. In HCT116, 6-TG/UVA and UVA alone induces PCNA\* the position of which is indicated by the arrow. The predominant initial product of formaldehyde treatment of human cells is a PCNA complex with slightly faster migration (\*\*\*). A second more slowly migrating species (\*\*) forms at later times. A third complex, which migrates at a similar position to PCNA\* represents a minor reaction product. This pattern is also seen in HCHO treated SF9 cells and *X. laevis* extracts. Although the higher MW *X. laevis* form is not evident in this particular experiment, it can be seen in Figure 3c.

A high MW (200kDa) form of PCNA has been described previously and was ascribed to inter trimer crosslinking (Naryzhny et al, 2005). We also observe a complex with this mobility after high levels of photochemical crosslinking by 6-TG/UVA or UVA alone (see for example: A2780 30 $\mu$ M 6-TG + 30kJ/m<sup>2</sup> UVA (Supp. Fig S1a): Raji 300kJ/m<sup>2</sup>, S phase (Fig. 3a)).

UVA does not form PCNA complexes of SF9 or *Xenopus* PCNA. This is consistent with a requirement for His153 which is replaced by Gln in these species. Formation of the insect and amphibian PCNA forms (\*\*\*) and (\*\*\*) by formaldehyde is consistent with chemical crosslinking via the conserved aminoacids – including the primary amino groups of Lys110 and Arg146 (Naryzhny et al, 2005).

c) By oxidizing agents

Asynchronous CCF-CEM cells were treated with 0.03% H<sub>2</sub>O<sub>2</sub> or KBrO<sub>3</sub> at the concentrations shown. Extracts were prepared at the indicated times and PCNA analysed by western blotting.
