# Supplementary material
Source: PubMed Central journal article supplement (PMC2247395)
Supplement: 7401084-s3.pdf [file 7401084-s3.pdf]

Supp. Table 1

## Mass spectrometric analysis of immunoprecipitated PCNA\*

| Protein               | Mass (kDa) | Score <sup>1</sup> |
|-----------------------|------------|--------------------|
| HSP90 alpha isoform 1 | 84.6       | 376                |
| HSP90 beta            | 83.2       | 293                |
| PCNA                  | 28.7       | 160                |
| Ku80 (XRCC5)          | 82.7       | 139                |

(<sup>1</sup>scores > 51 indicate identity or extensive homology)

PCNA-containing material was immunoprecipitated (PC10 antibody) from chromatin enriched extracts of CCCF-CEM cells that had been grown in the presence of 6-TG (1 $\mu$ M, 24h) and UVA irradiated (20kJ/m<sup>2</sup>).

Immunoprecipitated material was separated by PAGE on an 8% gel. Individual protein bands in the region between 70-100kDa in which PCNA\* migrates, were identified following staining (GelCode<sup>®</sup>, Pierce). These were excised and analysed by electrospray tandem mass spectrometry (QTRAP). One band was found to contain PCNA together with the proteins listed above. PCNA was not found in the other bands. Trypsin and immunoglobulin heavy chains were also identified. These reflect artefacts of sample preparation and analysis.

The clustering of sizes around 83kDa suggests that PCNA\* has a similar mass. The absence of any protein of 55kDa in this band is more consistent with a complex comprising only crosslinked PCNA subunits rather than a PCNA subunit (or subunits) linked to a non-PCNA protein (or proteins).
